# Supplementary material for: High-Throughput Characterization of Blood Serum Proteomics of IBD Patients with Respect to Aging and Genetic Factors
Source: PLoS Genet. 2017 Jan 27;13(1):e1006565. doi: 10.1371/journal.pgen.1006565 (PMC5271178; doi:10.1371/journal.pgen.1006565)
Supplement: S5 Table — (XLSX) [file pgen.1006565.s013.xlsx]

## Sheet: TableS5_pSNPs_GWAS_eSNPs
chr	position(hg19)	effective allele	non-effective allele	GWAS trait	GWAS_pvalue	GWAS_beta	GWAS_direction1	geneSymbol	GWAS_reference	pQTL_trait	pQTL_direction2	pQTL_FDR	eQTL_trait	eQTL_tissue	eQTL_direction3	eQTL_pvalue_nominal	eQTL_qvalue
1	154426264	A	G	CAD	4.54e-08	0.05	-1	IL6R	CARDIoGRAMplusC4D Consortium, Deloukas P, Kanoni S, Willenborg C, Farrall M, Assimes TL, Thompson JR, et al. Large-scale association analysis identifies new risk loci for coronary artery disease. Nat Genet 2013 45:25-33.	IL6R	1	<0.01	IL6R	blood	-1	3.15473e-27	<0.01
20	34198334	A	G	Height	7.4e-46	-0.058	-1	CPNE1	GIANT study; Wood AR, Esko T, Yang J, Vedantam S, Pers TH, Gustafsson S et al. (2014). Defining the role of common variation in the genomic and biological architecture of adult human height. Nature Genetics 11:1173-86.	CPNE1	1	0.02	CPNE1	cerebellum	1	2.72259e-08	0.0258546
19	51728477	A	G	AD	6.492e-08	-0.0945	-1	CD33	IGAP study; Jean-Charles Lambert et al. Meta-analysis of 74,046 individuals identifies 11 new susceptibility loci for Alzheimer's disease. Nature Genetics, 2013, 45 : 1452–1458. doi:10.1038/ng.2802 [PubMed ID: 24162737]	CD33	-1	<0.01	CD33	NA	NA	NA	NA
3	49721532	A	G	IBD	1.86e-17	1	1	MST1	Jostins L, Ripke S, Weersma RK, Duerr RH, McGovern DP, Hui KY, et al. Host-microbe interactions have shaped the genetic architecture of inflammatory bowel disease. Nature. 2012;491(7422):119-24	MST1	-1	<0.01	MST1	liver and subcutaneous fat	-1	7.65078e-10	0.01
1 GWAS_direction, "1" denotes the effective allele is linked to higher disease risk or higher body height; "-1" denotes the effective allele is linked to lower disease risk or lower body height.
2 pQTL_direction, "1" denotes the effective allele is linked to higher serum peptide level; "-1" denotes the effective allele is linked to lower serum peptide level.
3 eQTL_direction, "1" denotes the effective allele is linked to higher mRNA level; "-1" denotes the effective allele is linked to lower mRNA level.
