# Supplementary material for: High-Throughput Characterization of Blood Serum Proteomics of IBD Patients with Respect to Aging and Genetic Factors
Source: PLoS Genet. 2017 Jan 27;13(1):e1006565. doi: 10.1371/journal.pgen.1006565 (PMC5271178; doi:10.1371/journal.pgen.1006565)
Supplement: S10 Table — Expression measured as log2-probe intensity. (XLSX) [file pgen.1006565.s018.xlsx]

## Sheet: TableS10.expression_stats
Table S10. Protein expression summary statistics. Expression measured as log2-probe intensity.
probeId	median	min	max	mean	sd
SL000318	10.5147	8.08958	13.9979	10.6346	1.02302
SL002662	11.0169	9.54342	11.9093	11.0029	0.320473
SL000591	9.39081	8.23601	10.6976	9.40692	0.305304
SL000319	13.2411	12.5128	14.3556	13.2518	0.236128
SL000276	13.8285	12.1199	15.6752	13.8031	0.721818
SL000573	15.7187	14.1138	17.2077	15.7145	0.340846
SL000563	9.93177	7.75489	11.6014	9.87241	0.619473
SL003328	16.2041	15.6502	16.7326	16.2013	0.179274
SL000045	11.0852	9.90222	12.0049	11.0624	0.373226
SL000527	10.5729	8.88203	12.6821	10.5349	0.669894
SL001777	11.1917	10.541	12.1381	11.201	0.293186
SL004153	8.23793	7.2937	10.7262	8.29528	0.490756
SL000456	15.0514	13.8443	16.1485	15.1155	0.507537
SL004676	10.5947	9.36435	11.4516	10.5818	0.292524
SL005172	9.45635	8.45039	10.8595	9.45731	0.392104
SL003041	17.9911	15.2043	18.6022	17.9838	0.263975
SL000049	12.3383	11.6653	12.9087	12.3398	0.226086
SL000590	15.8858	15.0317	16.6642	15.8849	0.291732
SL000019	14.061	12.7445	14.9708	14.056	0.359249
SL000309	15.6487	12.1819	16.6315	15.614	0.386739
SL000312	17.3197	16.3357	18.207	17.3105	0.310049
SL003220	17.8894	16.8164	18.5332	17.8971	0.235613
SL000440	10.2653	7.87958	12.0928	10.1934	0.832018
SL000496	15.4941	12.4712	17.1093	15.4823	0.762394
SL003191	14.9725	12.7973	16.5688	14.9962	0.35816
SL002077	16.7834	14.6823	17.8466	16.7309	0.563677
SL000695	7.22304	5.81506	9.41236	7.26768	0.696009
SL000248	18.0375	17.1842	18.9836	18.038	0.249448
SL000323	11.0046	10.0161	12.4375	10.9722	0.301392
SL004668	16.4115	14.6864	17.7632	16.3871	0.573206
SL004669	16.5732	15.0935	17.6994	16.5544	0.525712
SL000398	11.2496	10.2587	12.583	11.2844	0.39007
SL003327	9.94266	9.13366	11.2404	9.96793	0.311982
SL005171	12.0785	9.16491	13.6881	11.9227	0.624901
SL000047	10.4965	9.6226	13.0891	10.5304	0.396216
SL003192	17.6428	17.0067	18.2634	17.6335	0.177739
SL000048	11.4128	10.0752	12.2379	11.4107	0.276825
SL000250	10.9103	9.32193	11.746	10.9009	0.29019
SL005158	14.2894	13.4698	15.1429	14.3052	0.352892
SL000420	8.94778	7.66249	13.17	9.15487	0.878774
SL000532	11.8809	10.4542	12.8844	11.8954	0.311262
SL003323	12.7968	11.0359	14.9971	12.7868	0.664793
SL000017	14.5966	11.4779	16.553	14.4814	0.967222
SL000437	14.8671	6.85549	16.5758	14.7711	1.13802
SL004689	15.3424	13.7157	16.1494	15.3246	0.344215
SL000325	16.9275	15.5927	17.5945	16.8825	0.367178
SL000468	11.9206	9.94676	15.1152	12.0229	0.811766
SL003309	14.9216	12.6316	16.6263	14.9117	0.601601
SL003324	12.4695	11.2018	13.1222	12.4616	0.298594
SL005152	11.8998	11.2528	14.9065	11.9265	0.335029
SL004159	16.9024	15.9824	17.8196	16.8735	0.314018
SL004469	10.9742	8.24745	11.8862	10.9826	0.381402
SL000344	11.1191	9.84282	12.3893	11.119	0.404216
SL000358	9.30332	7.71287	12.3408	9.29347	0.504071
SL002525	11.6679	10.231	12.346	11.6334	0.264752
SL003863	6.23074	5.63517	9.57099	6.31274	0.394154
SL008904	8.35094	7.24031	10.255	8.38333	0.401749
SL006397	9.84565	8.93458	10.6131	9.85988	0.271755
SL004457	9.82798	8.40173	13.3764	9.87439	0.553521
SL000310	7.27612	5.98641	15.823	7.47505	0.999947
SL006108	11.2121	9.11608	14.5266	11.2554	0.770239
SL008609	10.3721	9.14109	11.7591	10.3835	0.488003
SL004466	11.398	10.2906	12.7789	11.3934	0.307241
SL000272	15.3115	12.8774	16.5258	15.2491	0.514182
SL006550	13.7132	11.6304	15.0089	13.6786	0.498662
SL006777	12.724	10.4337	14.3799	12.7026	0.562729
SL000064	6.86047	6.30925	12.618	7.15553	0.947403
SL000550	13.6126	7.46923	15.9056	12.5648	2.42147
SL010349	11.3138	9.22858	14.3009	11.255	0.846405
SL010348	11.5972	9.92333	13.726	11.508	0.64466
SL004876	15.5669	14.1288	16.245	15.5523	0.359662
SL002705	13.6787	10.5945	14.8694	13.6159	0.503789
SL000271	11.2844	10.2109	13.4522	11.4019	0.541435
SL000283	10.5084	9.41003	11.3889	10.4992	0.382779
SL004015	14.2466	13.6139	15.1704	14.2499	0.249655
SL004258	11.5245	10.1183	13.164	11.5442	0.594392
SL000249	11.0847	10.0264	13.5227	11.1293	0.411017
SL000251	11.2337	10.6019	12.1172	11.2309	0.221602
SL000311	13.5898	13.1235	14.0498	13.5983	0.160026
SL006512	12.1558	7.37156	13.3422	11.9732	0.856836
SL000566	14.7181	13.3522	15.6136	14.6833	0.399799
SL006830	11.0332	9.50204	12.5605	11.0546	0.402071
SL000467	14.8443	13.75	16.2177	14.8418	0.383365
SL000254	13.2051	11.9535	14.4141	13.2072	0.361601
SL000493	9.87298	8.90298	12.6028	9.93321	0.44955
SL000322	17.0976	15.7082	17.641	17.0712	0.275853
SL000414	14.9326	13.8976	15.705	14.9315	0.273554
SL000426	14.5977	12.6314	16.5534	14.4821	0.781334
SL000541	11.4967	10.904	13.5032	11.5276	0.297411
SL000545	15.2369	14.3776	15.9203	15.2234	0.298135
SL000091	13.9308	12.6855	15.9263	13.9571	0.606455
SL000415	15.899	15.4583	16.2737	15.8978	0.158091
SL000601	17.8911	17.3224	18.4726	17.8961	0.196017
SL003687	13.125	12.2308	15.2932	13.1502	0.444488
SL005202	11.9628	7.00562	13.5621	11.6029	1.31995
SL000316	16.9626	11.5906	17.5639	16.7786	0.788764
SL000321	9.87851	9.0872	11.7407	9.89596	0.293687
SL017189	15.5142	13.7864	16.8163	15.5001	0.415778
SL001896	11.0191	9.22231	12.6119	10.9985	0.517515
SL004708	16.9015	15.2308	17.7034	16.8944	0.2202
SL004742	15.1005	13.5082	16.0282	15.0832	0.360288
SL005572	10.2008	8.39318	10.9127	10.1601	0.349736
SL004739	14.5466	10.2657	15.6807	14.0002	1.25751
SL002823	12.3688	11.5705	13.2896	12.3805	0.280948
SL000003	11.7348	10.876	12.8177	11.7354	0.355613
SL000357	12.8814	9.76055	14.3433	12.6659	0.991096
SL000360	13.7174	12.5184	14.3139	13.6833	0.287783
SL000313	11.4186	9.58402	16.5839	11.4541	0.779739
SL000622	13.3375	12.1066	14.5962	13.3162	0.381235
SL000510	9.44377	8.41659	14.0238	9.50166	0.584778
SL005201	11.0391	9.35403	12.8598	11.0627	0.647338
SL005102	12.2308	10.0611	14.7612	12.31	0.949908
SL003522	12.7445	11.7545	13.878	12.7502	0.39251
SL006448	11.4467	9.86898	12.6639	11.4079	0.458632
SL003440	10.883	9.88783	12.0454	10.891	0.315305
SL007464	17.3033	16.2061	18.0482	17.2834	0.325619
SL004857	16.2159	14.8245	17.35	16.2122	0.455838
SL004791	13.2349	12.2512	15.4028	13.3666	0.577705
SL005209	9.39896	8.50541	11.3564	9.4195	0.328992
SL008309	15.6586	14.4479	16.6809	15.6683	0.349462
SL004400	12.2282	8.84015	13.8299	11.9719	1.05782
SL000277	17.6885	16.7557	18.258	17.6486	0.291564
SL000558	15.8728	14.1446	17.4664	15.888	0.610218
SL004134	12.5634	11.3452	13.8996	12.5423	0.312661
SL000403	15.8414	14.6818	16.7979	15.8327	0.308736
SL000053	10.0452	9.46985	11.6589	10.0753	0.338618
SL003322	13.0137	10.9619	14.2751	12.9783	0.476423
SL003951	11.0989	9.10565	12.9231	11.0822	0.404148
SL003060	13.0506	12.2796	13.8404	13.0371	0.259156
SL004016	13.391	12.4834	14.2942	13.4148	0.30263
SL004010	13.6553	12.365	14.901	13.6338	0.445224
SL003043	13.0408	11.004	14.7825	13.0168	0.759449
SL004365	9.57175	8.83226	10.9237	9.60783	0.280911
SL000055	15.5437	14.3206	16.2651	15.5074	0.319297
SL004143	12.735	11.4056	13.7723	12.7048	0.344336
SL003193	13.1044	11.7604	14.4167	13.0794	0.487834
SL003280	12.5659	11.5415	14.481	12.5691	0.302354
SL000466	15.6545	13.7003	17.5666	15.6572	0.690397
SL000498	11.5478	10.5678	12.8375	11.6121	0.341733
SL001796	15.9692	13.9261	17.3295	15.9749	0.600987
SL000546	12.6225	12.0609	14.1584	12.6625	0.283296
SL006114	10.8184	10.0172	11.8777	10.8459	0.30195
SL000002	12.1775	11.5631	13.0265	12.1975	0.237915
SL001996	9.91707	8.45984	12.1576	9.93921	0.528602
SL002519	9.28933	8.38068	10.3488	9.28151	0.30321
SL003872	13.6345	12.5739	14.5344	13.6196	0.311827
SL017612	14.0797	13.212	15.7808	14.1759	0.48859
SL004588	15.0399	14.0514	16.5714	15.096	0.511905
SL004149	9.76736	9.24935	11.7551	9.79394	0.279345
SL000509	13.0514	12.0899	15.0329	13.0768	0.354215
SL004579	13.2079	12.2499	14.4448	13.2326	0.407322
SL004183	16.434	15.0955	17.4494	16.4035	0.394622
SL003648	13.7651	12.4919	16.8454	13.8947	0.639601
SL002506	10.5508	10.1473	13.0006	10.5795	0.264272
SL001992	10.9507	10.367	11.9624	10.9797	0.284003
SL004672	12.5852	11.5444	13.7835	12.5625	0.428978
SL000337	13.4982	12.9403	15.7119	13.582	0.405713
SL000383	9.95332	8.96	12.4494	10.0828	0.502696
SL002644	15.1522	14.1586	15.9887	15.1168	0.318812
SL000450	11.5105	10.8529	13.34	11.5761	0.339798
SL001947	11.8	10.9958	13.6442	11.8259	0.40064
SL002528	11.5675	10.7289	15.4703	11.7168	0.619927
SL000530	11.2706	10.3584	12.2944	11.2932	0.297182
SL003334	11.4231	11.0114	15.0253	11.4778	0.338294
SL004683	8.98014	8.11114	10.3873	8.99582	0.286641
SL005218	10.3396	9.66409	11.3806	10.3728	0.303271
SL004337	8.78463	7.91169	10.8633	8.84625	0.479352
SL004345	9.86682	9.01709	11.1106	9.89741	0.34099
SL003176	11.3353	10.5712	12.517	11.3368	0.233556
SL000462	10.0102	7.83794	13.157	10.0541	1.10632
SL000474	11.3522	9.9629	12.7232	11.3483	0.418597
SL004347	9.90463	9.24365	11.7885	9.95079	0.316945
SL004355	11.8165	11.2515	12.6103	11.8177	0.207117
SL000524	11.0441	8.72212	14.2999	11.1921	0.992067
SL000525	11.2727	10.608	13.3444	11.2983	0.350109
SL000424	15.3969	14.0317	17.8256	15.3992	0.577686
SL001995	13.6761	11.664	14.7509	13.6575	0.377457
SL002081	13.197	12.1848	14.3173	13.2003	0.365708
SL000134	13.5228	12.5105	15.3074	13.525	0.356024
SL004650	11.9933	10.8757	13.5014	12.008	0.259976
SL003199	13.4183	12.4807	14.5755	13.4221	0.344243
SL000605	11.6425	10.8527	15.4715	11.8277	0.723541
SL004768	13.0282	11.8697	14.3388	13.0214	0.339564
SL000320	14.4837	12.551	16.1817	14.4598	0.62832
SL000409	10.1255	9.13545	12.6225	10.1804	0.509031
SL006914	7.33718	6.91169	11.1876	7.38989	0.381224
SL004723	12.0703	11.1238	12.8788	12.0654	0.282392
SL004718	8.08108	7.45368	9.43754	8.11343	0.255974
SL004009	12.063	10.1477	15.2158	12.1255	0.811362
SL004306	11.2852	10.3327	13.611	11.3643	0.604433
SL003329	14.2531	13.0374	15.2581	14.2347	0.401826
SL003302	11.6091	10.5362	13.3118	11.6377	0.458219
SL000006	13.2042	12.0918	14.5009	13.242	0.396672
SL000396	10.4656	9.93546	16.3331	10.4942	0.433674
SL005168	10.5995	9.20016	11.922	10.5665	0.456315
SL000506	10.082	8.5988	13.1777	10.3236	0.995511
SL000526	10.8489	10.1304	12.1302	10.9402	0.402548
SL004362	10.7483	9.96232	11.6618	10.7645	0.273101
SL001720	13.7105	12.3009	14.7944	13.7135	0.308985
SL004855	15.6449	14.2384	16.7092	15.5838	0.469705
SL004856	11.7835	10.6905	12.9865	11.7845	0.328929
SL005160	12.2818	11.5578	12.9279	12.2896	0.245961
SL003173	11.2073	10.4814	13.3889	11.2792	0.369094
SL017610	12.1471	10.8456	15.2433	12.2716	0.816265
SL004850	9.56853	8.61213	11.0395	9.54461	0.37714
SL005193	12.4647	11.5931	13.3979	12.4508	0.226228
SL005196	11.1139	10.5085	11.8025	11.0975	0.239831
SL004516	12.8535	10.6665	14.1912	12.8268	0.632846
SL004939	12.488	11.6541	15.9716	12.5217	0.375146
SL005219	9.58327	7.01123	12.0417	9.09801	1.27455
SL005059	14.6874	13.5924	15.5401	14.742	0.339305
SL000338	12.9595	11.8588	16.2063	13.0243	0.541405
SL005157	11.7405	11.0278	16.1259	11.804	0.531707
SL000428	9.66959	7.46516	13.6109	10.0366	1.30797
SL004354	13.0793	12.0439	13.9623	13.0672	0.32608
SL001795	11.7622	10.5123	14.8548	11.7836	0.437803
SL008416	11.134	10.0276	12.2753	11.1402	0.462937
SL000164	11.4731	10.1233	13.1605	11.4755	0.454775
SL002704	10.648	10.1635	12.9061	10.6776	0.277111
SL004260	11.9222	11.0839	14.131	11.9638	0.488336
SL000603	13.0618	10.713	15.697	13.0133	0.607497
SL000343	11.7084	11.0513	12.4551	11.7299	0.238155
SL003744	13.753	12.9546	14.601	13.7434	0.311626
SL003733	12.5293	11.9217	13.3808	12.5393	0.221545
SL001800	13.8364	13.089	15.0269	13.8802	0.356927
SL010368	11.4074	9.96347	12.7405	11.4258	0.451491
SL008956	11.5933	10.3636	12.6938	11.5832	0.38263
SL006610	12.3477	10.6232	14.9714	12.3401	0.551477
SL009213	15.1584	12.5058	16.2378	15.1025	0.532831
SL004673	10.5061	9.2341	11.3904	10.4944	0.351292
SL010371	10.9129	10.3001	13.4523	10.9618	0.278108
SL008759	14.064	11.7345	15.8971	14.0062	0.724381
SL000678	10.863	8.91558	12.4469	10.8559	0.616269
SL008639	11.3812	10.7007	12.2143	11.3752	0.247256
SL003916	12.3531	10.9824	13.4816	12.3376	0.285622
SL000640	13.4875	12.3322	14.8329	13.4876	0.412835
SL005797	12.2836	10.7301	14.9422	12.3934	0.745789
SL000158	12.0257	10.9556	13.1734	12.0268	0.28295
SL010378	10.995	10.2533	13.115	11.0951	0.464575
SL004118	13.0665	11.8064	14.2972	13.0824	0.371961
SL010390	10.927	9.80429	12.2088	10.9506	0.429091
SL006544	15.0775	13.5369	16.4862	15.0594	0.488725
SL002706	12.6197	11.786	13.8481	12.642	0.390901
SL010450	10.0627	9.58534	12.0851	10.0757	0.259437
SL010454	12.5105	12.0397	13.2338	12.5041	0.200897
SL007049	9.2861	8.35447	14.4355	9.52588	0.967425
SL004438	12.3256	11.1033	14.1139	12.3803	0.512557
SL010457	9.8699	8.89451	13.2115	9.92778	0.502685
SL017613	11.309	9.46066	14.5679	11.3761	0.964216
SL006542	11.2725	10.637	13.7779	11.3647	0.483287
SL005087	13.5619	12.3675	14.7029	13.5399	0.365312
SL010465	13.6157	12.7934	14.5066	13.625	0.330548
SL007673	11.0352	10.6355	13.7368	11.0952	0.32306
SL004515	11.7383	9.52904	13.8749	11.7146	0.789374
SL010468	11.127	10.5812	12.7061	11.1438	0.230326
SL010469	13.4403	12.0335	15.1559	13.4507	0.442054
SL001998	15.8364	14.2795	17.1964	15.8101	0.443315
SL007206	9.88463	8.79766	12.4712	9.98756	0.612161
SL007207	15.2217	12.8068	16.8918	15.1743	0.742869
SL005574	12.1107	10.0257	14.7173	12.2318	0.858989
SL003994	10.984	9.18611	13.5695	10.9863	0.537258
SL010288	11.6687	9.1375	14.1132	11.6422	0.879396
SL009400	11.9323	10.9733	13.0908	11.9501	0.211221
SL004781	10.3585	7.91049	12.4913	10.421	0.832392
SL010612	10.9224	9.96607	13.575	10.9553	0.333658
SL010500	9.44729	7.42878	12.308	9.46057	0.762393
SL007250	12.1334	11.147	12.9473	12.1436	0.275205
SL017614	11.2747	9.65821	11.9201	11.2602	0.236519
SL000565	10.3042	9.19057	12.5102	10.3351	0.468782
SL007560	11.4865	10.5395	13.6747	11.5059	0.350937
SL010617	11.377	9.06932	13.1977	11.3061	0.745604
SL003703	12.4596	11.8637	14.1906	12.4864	0.277122
SL010521	10.8987	9.5306	13.467	11.0188	0.861614
SL010490	13.0345	11.6001	15.0015	13.0414	0.415654
SL004137	11.31	10.4739	12.1302	11.3273	0.231573
SL004636	12.0814	10.8691	12.8314	12.0693	0.309548
SL009324	12.5852	11.6818	14.413	12.6572	0.400899
SL004152	10.5592	10.1333	11.3072	10.5743	0.20053
SL001797	12.5102	11.925	12.954	12.4944	0.161634
SL001945	15.0402	13.558	16.591	14.9529	0.56328
SL010517	13.2884	12.3193	13.9124	13.2765	0.259549
SL000342	13.2602	11.6077	17.0393	13.377	0.928171
SL003179	9.49065	7.61545	11.4426	9.5022	0.609087
SL004536	11.791	8.74551	15.1163	11.761	1.57876
SL003187	10.953	9.15558	12.1858	10.9155	0.577294
SL003190	12.2764	11.5688	14.3002	12.3803	0.458858
SL004008	13.3165	11.1775	15.2952	13.332	0.738413
SL004712	12.53	10.4751	13.5118	12.5095	0.468603
SL003196	10.8243	9.4672	12.2769	10.8327	0.505832
SL004367	12.1391	10.8201	13.4712	12.1584	0.361833
SL005392	10.9393	10.0454	13.6961	10.9518	0.343408
SL009341	14.6484	13.7586	15.4761	14.6562	0.244445
SL007056	11.5714	10.7144	13.3526	11.597	0.302672
SL004865	13.5842	12.4599	14.3913	13.5722	0.309462
SL010489	13.7512	12.9725	14.2022	13.7455	0.189215
SL006029	11.6974	10.0677	14.0853	11.7168	0.481361
SL008936	13.3936	12.4868	14.2916	13.3876	0.342472
SL007640	11.2228	10.3277	13.3265	11.2556	0.288829
SL006694	14.6955	13.4189	15.5698	14.6409	0.440281
SL011049	13.5026	12.4292	14.0595	13.4729	0.254188
SL004120	12.3292	11.6462	13.6426	12.3394	0.241785
SL009412	13.3	12.6707	14.2375	13.3166	0.197292
SL008916	13.4914	12.7175	14.2899	13.4982	0.188634
SL004060	14.8698	14.2114	15.5851	14.8674	0.227971
SL004845	15.2784	14.3841	15.7154	15.252	0.214131
SL010462	12.9671	12.2426	14.2154	12.98	0.250788
SL008909	13.8741	13.1967	14.4601	13.8654	0.220499
SL007059	15.2773	14.7143	15.7533	15.2705	0.170645
SL011069	15.1238	14.0693	15.6398	15.098	0.244122
SL010376	12.2375	11.1821	13.0356	12.2286	0.290164
SL010501	11.1065	9.68001	12.4123	11.134	0.372245
SL006805	13.532	12.4037	14.2534	13.5196	0.307423
SL004804	11.705	10.7415	13.4589	11.714	0.308322
SL008193	13.2517	12.4203	14.2784	13.2278	0.339886
SL005491	13.9935	13.0064	14.5808	13.9711	0.238639
SL010530	11.5227	10.5473	12.2362	11.5213	0.276224
SL007327	10.1097	8.6865	12.5963	10.1829	0.693924
SL005263	12.1284	11.3242	13.1124	12.161	0.309864
SL008588	12.0105	11.2824	13.0168	12.0246	0.274236
SL010381	15.4588	14.4691	15.934	15.4403	0.229268
SL010518	12.1344	11.3366	12.9472	12.1453	0.237379
SL004489	12.0674	10.8855	12.812	12.0481	0.291934
SL003201	13.9644	13.3072	14.4339	13.9685	0.177576
SL004720	15.0147	13.9006	15.6152	14.9781	0.262565
SL007471	11.624	10.7088	12.1224	11.616	0.207651
SL003679	15.7963	15.0803	16.5606	15.8072	0.236364
SL003919	15.2247	14.2978	15.9056	15.2032	0.240094
SL010466	10.1361	9.44232	11.8843	10.1552	0.317195
SL000252	15.091	13.2983	16.4964	15.1239	0.578245
SL000617	12.6194	11.8137	14.1296	12.6926	0.415063
SL000268	13.819	13.0059	15.3568	13.8326	0.329857
SL000382	9.14593	7.55536	13.0554	9.24574	0.93181
SL003993	12.0236	11.1787	12.9206	12.0388	0.274794
SL000346	12.6118	12.2916	13.4253	12.6348	0.152701
SL000542	11.2304	10.1143	13.8804	11.1977	0.444652
SL000481	14.3441	13.1058	15.0445	14.317	0.300852
SL003974	10.6062	9.61655	11.632	10.6113	0.24489
SL004867	10.5599	8.73539	15.3341	10.7228	1.00206
SL010458	10.4729	9.81442	12.0645	10.5087	0.328481
SL002086	10.9644	8.74214	13.9217	10.9136	0.545834
SL004765	10.3327	9.69923	11.2447	10.3607	0.255057
SL010467	10.6155	10.2228	15.5831	10.7183	0.511083
SL004823	16.0699	14.8735	17.8395	16.1247	0.624897
SL011532	11.4249	10.3865	13.3711	11.4177	0.323483
SL003785	14.2345	9.65249	17.4354	13.9257	1.42288
SL008102	13.7427	12.254	16.8066	13.845	0.68497
SL004919	10.9363	10.5236	14.2812	11.0942	0.539407
SL005679	12.2658	11.0669	14.8898	12.4174	0.723267
SL004938	9.17742	8.62242	11.5798	9.21986	0.309421
SL009628	11.2482	10.5764	13.0713	11.2795	0.295076
SL005629	9.7848	8.50263	11.2616	9.80179	0.480836
SL008808	11.3719	10.3865	13.0346	11.3768	0.300694
SL008143	11.3131	10.2219	15.5993	11.5177	0.841685
SL003680	9.46985	7.85237	11.0602	9.45756	0.566728
SL004511	13.5692	11.0645	16.3355	13.6252	1.0077
SL000461	11.1378	7.9331	16.627	11.2795	1.86184
SL001943	14.4768	13.2379	15.5869	14.466	0.405552
SL002755	14.0441	11.343	16.8968	14.0997	0.907107
SL000537	13.7676	11.4175	15.7514	13.8682	0.643779
SL000560	14.524	12.9765	15.5465	14.513	0.40712
SL003198	14.6871	13.8267	15.9603	14.7296	0.425426
SL000586	15.2564	13.0429	16.9067	15.2627	0.632678
SL000124	11.9733	10.7575	13.5653	11.9608	0.395885
SL017611	11.4711	10.8308	12.9742	11.5035	0.331222
SL000247	9.43108	6.84423	14.5814	9.55373	1.28264
SL003658	8.84674	7.39832	12.6444	8.90438	0.736816
SL008039	11.0406	8.3936	13.7118	11.0837	0.597624
SL011769	8.2317	7.1127	11.6438	8.25347	0.438385
SL004920	12.11	11.2499	12.9	12.1017	0.228344
SL004757	9.80381	8.46352	13.9175	10.0602	0.922458
SL004146	12.0438	10.1872	14.8609	12.164	0.840485
SL002650	12.6701	9.57554	14.666	12.4923	0.989401
SL004154	8.84987	7.45943	10.168	8.80038	0.551666
SL008331	9.81105	8.73505	13.9717	9.91742	0.708387
SL000539	9.87267	8.69766	11.644	9.93435	0.502054
SL005358	11.5441	8.93221	15.4074	11.5551	0.956591
SL005034	9.75689	7.30469	14.9562	9.87847	1.12916
SL011202	10.8583	9.08295	15.3057	11.0289	0.855512
SL005115	11.2229	10.1815	12.8512	11.2207	0.397186
SL003655	14.0818	12.9459	16.987	14.2275	0.694429
SL004812	12.056	11.1874	15.4035	12.2104	0.618546
SL011809	9.96867	9.53935	11.301	9.99004	0.227785
SL013488	10.7277	9.31967	12.044	10.7309	0.454878
SL000572	11.4507	7.97785	16.8474	11.7954	2.22013
SL000051	16.7119	12.0014	17.7958	16.5028	0.838783
SL002922	12.7337	11.913	13.5522	12.7364	0.253388
SL007752	11.4923	10.5304	12.2404	11.4949	0.231876
SL013570	13.4108	12.343	14.0206	13.3932	0.266996
SL001888	14.7663	13.5887	16.1539	14.7526	0.39175
SL004484	14.7688	11.433	17.2828	14.6558	1.22735
SL006713	12.2018	10.9725	14.2817	12.2416	0.556402
SL014028	12.1535	11.4612	13.1191	12.1732	0.295243
SL009791	10.5314	9.36151	14.0373	10.6636	0.675088
SL005488	13.9024	12.5706	16.0245	13.9227	0.511449
SL007502	11.9297	10.9743	12.6915	11.9285	0.312726
SL004070	15.5832	14.7909	17.361	15.6712	0.43975
SL010519	12.5097	11.266	13.7729	12.4977	0.342043
SL000308	13.462	9.82002	15.6221	13.4146	0.63139
SL003764	13.1229	11.9549	14.7341	13.146	0.436644
SL000535	12.2448	10.6457	13.1515	12.2434	0.378124
SL004363	11.6946	10.1737	12.6923	11.6818	0.356975
SL014092	12.7734	11.6195	13.963	12.7861	0.441192
SL008822	9.5265	8.27891	10.6623	9.52012	0.389728
SL012457	11.73	10.1826	12.7643	11.6776	0.393415
SL006406	10.1476	9.40344	11.0933	10.1376	0.283107
SL011508	11.5057	10.5746	12.5462	11.4974	0.293211
SL010830	12.4368	11.4357	17.158	12.6258	0.764042
SL004253	11.6773	10.6584	12.3962	11.6582	0.297434
SL005361	15.6953	14.9551	16.3342	15.6807	0.201295
SL007869	13.2276	12.2092	14.2216	13.2186	0.299318
SL003524	14.4287	13.3471	14.9684	14.3964	0.268532
SL006119	12.9694	11.9485	17.4226	13.2643	1.03672
SL012754	15.7707	14.6087	16.4894	15.7651	0.308921
SL007871	14.2512	13.0378	14.8888	14.2274	0.301137
SL016128	12.3288	11.5533	13.7238	12.35	0.3227
SL001737	12.0897	11.0128	13.8943	12.095	0.271247
SL004160	9.63554	8.79734	12.0055	9.65477	0.442457
SL003657	9.24793	7.91349	11.1642	9.23223	0.403614
SL004814	12.7092	12.1143	13.8876	12.7535	0.287
SL000022	11.7705	11.0273	17.3544	11.8341	0.508812
SL003643	10.2822	9.71029	11.111	10.2978	0.193398
SL000280	12.6659	11.9491	14.886	12.7493	0.39637
SL003300	15.3163	13.5235	16.3825	15.2598	0.525882
SL000836	9.21553	8.00899	17.8901	9.50265	1.16129
SL000460	11.9711	7.74079	17.8023	11.9457	2.15286
SL003182	9.36304	8.77182	15.664	9.63888	0.989026
SL000521	12.8213	10.828	16.0625	12.8603	0.876016
SL005789	11.2146	9.95507	12.5225	11.2439	0.438208
SL004605	11.8863	11.2442	13.0139	11.9175	0.226147
SL004208	11.8157	10.799	14.7749	11.8855	0.690889
SL008177	14.6342	14.1852	15.1051	14.6396	0.174479
SL004866	13.7151	11.926	17.085	13.8697	1.01037
SL008380	12.335	11.546	13.5017	12.3559	0.390225
SL011628	11.3198	10.5994	15.8432	11.4683	0.597566
SL008178	11.0233	9.79701	12.7016	11.0394	0.476373
SL004458	13.7185	12.4113	15.3265	13.7066	0.54477
SL006378	11.1908	10.6713	13.7776	11.2816	0.436334
SL005352	9.42522	9.12386	10.9172	9.4455	0.1574
SL002036	11.3042	10.6267	12.5903	11.3366	0.269326
SL003341	13.2075	12.1402	17.7946	13.2648	0.551544
SL006460	11.1448	10.5145	14.4146	11.1604	0.347597
SL007173	15.2062	14.6398	15.9723	15.2184	0.276347
SL003930	14.3566	13.5208	14.9562	14.3454	0.191477
SL007025	13.7152	9.57459	15.0069	13.1553	1.36863
SL006522	9.88448	8.84329	14.8186	9.88722	0.527973
SL001973	15.9899	15.2847	16.3397	15.9697	0.174106
SL006920	9.99619	9.47958	14.055	10.0597	0.419972
SL001815	15.6341	14.7399	17.2782	15.6626	0.389443
SL004296	13.0613	9.84408	17.3155	13.2104	1.15015
SL004915	12.0173	11.0579	13.5613	12.0412	0.375043
SL005694	14.5565	10.5351	17.8937	14.5659	0.996653
SL002803	11.7722	11.3411	15.0866	11.89	0.454941
SL003653	13.4589	12.9175	14.0285	13.4511	0.17244
SL004914	16.7395	15.8044	17.5147	16.715	0.300731
SL008176	12.4311	11.6471	14.1023	12.4696	0.30841
SL005764	11.9466	10.5588	13.797	11.9799	0.578142
SL006528	10.1869	9.60288	11.339	10.2156	0.296528
SL010388	11.0761	9.06824	13.9934	11.1684	0.705937
SL004853	12.1801	11.2218	15.4422	12.3257	0.612672
SL014270	12.2774	11.3186	13.5593	12.2723	0.385276
SL004556	14.1248	13.4181	15.2599	14.1625	0.3418
SL007179	9.54168	9.14797	11.6088	9.58403	0.27625
SL008414	11.115	10.5371	12.6642	11.1067	0.242533
SL007429	13.0424	11.8878	14.4735	13.0387	0.462226
SL004849	11.1215	10.3782	12.0005	11.1128	0.198877
SL005174	11.0703	10.3811	11.7992	11.0714	0.267255
SL005190	12.1889	7.87283	13.3916	12.095	0.58746
SL005191	13.2938	11.7187	14.5266	13.2815	0.448535
SL007328	10.8609	10.0505	12.2475	10.8774	0.2972
SL005208	10.8633	9.69905	13.0264	10.8714	0.455029
SL005703	14.1523	13.3131	15.089	14.1459	0.290215
SL008728	10.1556	9.58796	11.3342	10.1726	0.272434
SL005212	12.733	11.6028	14.7513	12.7648	0.368462
SL007680	12.0517	11.0466	12.8191	12.0286	0.30851
SL005169	10.0953	9.13417	11.7771	10.0989	0.332352
SL014292	14.3505	8.87006	15.559	14.2647	0.839917
SL005221	13.7958	12.9973	14.9235	13.8187	0.378656
SL005223	11.7255	11.1718	12.442	11.7263	0.214767
SL005230	12.2507	11.5453	13.3982	12.2776	0.31544
SL006921	10.3463	9.7342	15.4545	10.4137	0.476301
SL007237	15.4185	13.6292	17.2013	15.4272	0.649375
SL005730	15.0246	13.9778	15.5322	14.991	0.252525
SL016566	14.1492	13.2023	14.6029	14.1197	0.228062
SL010928	13.5677	12.8367	14.1095	13.5642	0.151664
SL016555	11.9124	10.7129	12.4214	11.907	0.220899
SL016553	11.3725	10.5797	13.0663	11.3784	0.284593
SL011404	11.0687	10.3314	11.9638	11.0814	0.182651
SL011405	11.1739	10.5985	14.0521	11.2114	0.296349
SL016567	12.8653	11.8445	13.5987	12.846	0.283378
SL007181	14.1205	13.3037	14.6126	14.1099	0.220534
SL010488	12.0115	10.9052	12.6654	11.9863	0.283341
SL014470	11.9746	11.0384	12.811	11.9798	0.282612
SL003520	11.5609	10.9593	12.4775	11.5773	0.202395
SL014469	11.0009	10.1602	16.7418	11.0797	0.55366
SL000406	10.6487	9.46516	12.5663	10.6942	0.477587
SL000401	9.49705	8.54998	11.0607	9.60246	0.559832
SL007195	12.5455	11.8539	13.3095	12.5636	0.200694
SL003717	13.4002	12.9392	14.2669	13.4234	0.202695
SL011808	9.79458	8.67349	13.0172	9.9454	0.657285
SL006970	11.4435	10.8532	12.326	11.4751	0.271259
SL004891	12.8655	11.1701	15.3754	12.8974	0.831476
SL003080	10.9223	10.5167	12.8322	10.9811	0.313154
SL008574	13.0253	11.1452	15.0202	12.9737	0.639322
SL007336	13.9957	12.7483	15.0498	13.9634	0.357231
SL004671	12.1993	10.7601	13.2611	12.2092	0.427756
SL003184	11.2712	9.03562	12.6052	11.1946	0.616843
SL004871	12.6216	11.7316	13.7382	12.6336	0.377372
SL007295	14.0183	12.8539	14.5804	13.9913	0.270856
SL003690	11.6477	10.5893	13.9035	11.6586	0.350949
SL003166	13.8251	12.7332	14.8744	13.8129	0.381888
SL010456	10.2169	8.90298	12.3689	10.2626	0.591768
SL000553	8.86511	7.41447	12.133	8.96454	0.687732
SL010250	11.6679	10.6241	15.5392	11.8514	0.748742
SL010384	13.5031	12.5871	14.4183	13.48	0.34537
SL010471	9.65177	8.06555	10.7444	9.62462	0.405565
SL009790	12.4014	11.6204	13.2602	12.3785	0.295618
SL003168	11.0934	10.6993	12.9764	11.1242	0.240583
SL004332	9.61839	9.20139	15.5141	9.72025	0.590393
SL000592	17.5998	16.6321	18.5195	17.5823	0.277974
SL000584	12.4874	11.526	14.2739	12.5011	0.215217
SL000324	12.4549	11.6188	13.1761	12.4642	0.281095
SL000345	11.9054	11.3273	13.7872	11.9655	0.346591
SL004333	8.82718	8.51175	10.2447	8.85431	0.191487
SL004342	11.7281	11.3347	16.2802	11.8052	0.464847
SL004066	9.61967	9.02431	15.7725	9.68927	0.563136
SL004182	9.66089	9.38952	10.3364	9.67855	0.120832
SL001716	11.9167	11.2673	12.7571	11.9181	0.173443
SL000133	9.65714	8.87682	13.1727	9.73819	0.379537
SL004643	10.2477	9.85456	13.0815	10.2837	0.252017
SL004144	11.8055	11.4086	13.2765	11.8374	0.19097
SL004142	11.3147	10.544	12.8009	11.3547	0.243226
SL002539	13.8841	12.1925	14.5696	13.8772	0.307998
SL000300	9.79067	9.20188	13.2264	9.88817	0.458882
SL000038	10.2722	9.52376	12.2283	10.3372	0.383579
SL004126	9.31402	8.89087	11.3304	9.36196	0.253367
SL003735	9.2281	8.91169	12.1564	9.31994	0.41437
SL003738	10.3984	10.0573	12.1977	10.4707	0.288426
SL004180	12.0979	11.6467	13.3237	12.0986	0.138885
SL004692	10.1913	9.78643	11.8807	10.2488	0.287609
SL004136	11.1353	10.6935	15.0757	11.1796	0.387452
SL004759	11.7765	11.0459	17.1491	11.9873	0.776302
SL004140	11.1938	10.4557	13.9355	11.2085	0.296803
SL004141	12.137	11.2495	13.1126	12.1407	0.354806
SL000009	9.59339	9.16993	13.8903	9.74178	0.541114
SL003803	8.36807	8.03232	12.2042	8.4461	0.440702
SL001890	9.83621	9.56358	17.1174	9.94066	0.646866
SL004751	10.4126	9.57232	12.7502	10.4536	0.299277
SL004697	9.07093	8.36545	10.259	9.08319	0.195611
SL004698	11.2984	10.839	13.8284	11.3345	0.285925
SL004147	11.4548	10.9882	13.4589	11.4769	0.229558
SL004148	10.0077	9.56148	14.2905	10.0798	0.404443
SL003307	11.4967	11.1681	14.757	11.6233	0.454465
SL004646	11.2286	10.8134	15.1077	11.2453	0.358145
SL004637	10.0128	9.59432	11.4953	10.0464	0.199505
SL004760	11.8688	11.267	15.755	12.0195	0.587801
SL000551	12.6261	11.5836	15.1978	12.7031	0.624616
SL000557	11.4789	10.8741	17.3591	11.5852	0.593444
SL003178	11.4997	11.0049	12.4587	11.5219	0.210659
SL004230	11.8743	11.0755	13.5162	11.9168	0.290201
SL004639	12.2148	11.4709	13.1267	12.2293	0.286087
SL004081	12.4977	11.6866	13.5865	12.5006	0.287352
SL005155	9.91259	9.54998	11.3856	9.94396	0.196465
SL000441	11.309	10.5556	14.0635	11.3561	0.409536
SL004297	9.72775	9.1634	12.3607	9.7809	0.331589
SL001721	11.7451	11.2907	13.2195	11.7486	0.156051
SL004685	9.09329	8.79604	10.8643	9.1278	0.190907
SL004364	11.9024	11.5014	14.0244	11.9372	0.223725
SL003197	11.5191	9.07253	13.6026	11.5004	0.693543
SL004326	10.2633	9.88065	11.4049	10.2691	0.1666
SL005153	12.5072	11.4402	13.5566	12.5181	0.39682
SL005159	9.33539	8.95099	10.9975	9.35249	0.191879
SL004591	10.2026	9.6756	12.7121	10.2488	0.338222
SL005178	11.7499	10.621	14.034	11.7754	0.349895
SL000497	10.6795	9.90087	12.0183	10.7418	0.411619
SL005199	8.83321	7.71356	11.2204	8.84173	0.477567
SL000528	12.3491	10.7017	16.9946	12.4838	0.7386
SL005235	8.98527	8.55995	14.3183	9.06979	0.479953
SL005206	8.78463	8.26209	12.0596	8.81247	0.330274
SL005236	10.6596	9.91633	12.8889	10.6812	0.332779
SL005217	9.2628	8.86821	13.9887	9.3809	0.485047
SL005220	10.4539	9.47188	13.3855	10.4857	0.454502
SL005226	11.7324	11.4318	13.4203	11.7643	0.204222
SL005229	10.4301	10.1591	12.7811	10.496	0.289341
SL001938	13.1158	11.7921	14.7652	13.1238	0.490695
SL004589	10.1032	8.97613	13.3586	10.2249	0.754411
SL004329	11.5927	10.2561	14.0711	11.7252	0.842953
SL004752	9.78021	9.23577	12.4033	9.79345	0.209035
SL004336	9.13237	8.72212	12.0167	9.2168	0.407848
SL004338	9.60715	9.1533	16.9421	9.68467	0.671253
SL003849	9.89026	9.47938	12.1958	9.91965	0.224704
SL000445	8.49265	8.14057	10.1949	8.53116	0.206437
SL001717	9.75539	9.42522	14.5661	9.84134	0.488514
SL004352	10.8589	10.3788	13.0865	10.8921	0.259992
SL004356	10.9475	9.59582	17.714	11.0185	0.818604
SL000515	9.20555	8.62278	10.7384	9.21301	0.216547
SL000581	11.6204	10.8215	12.8269	11.6214	0.206969
SL000020	13.7034	11.234	15.9912	13.7019	0.790685
SL004415	10.0304	9.79328	12.1233	10.0994	0.255109
SL004128	9.48382	8.78431	11.1717	9.50993	0.233188
SL004625	10.0393	9.45902	11.2685	10.0616	0.20186
SL006924	11.3241	10.2844	13.3273	11.3664	0.389846
SL001902	11.0931	10.2329	15.8762	11.1521	0.475478
SL004726	10.5933	10.0262	11.619	10.6129	0.200444
SL004704	11.9555	11.3809	13.669	11.9771	0.238615
SL004644	11.4199	10.5595	12.8849	11.4309	0.258274
SL000427	12.2712	10.2095	14.9413	12.3208	0.474511
SL004645	13.1506	12.0557	14.5529	13.1416	0.444337
SL006915	10.9352	10.635	15.1661	11.0431	0.461609
SL002763	11.1518	10.596	13.112	11.1811	0.28876
SL003800	10.2551	9.7949	13.8524	10.2982	0.329499
SL003915	12.4935	11.8091	14.1855	12.5163	0.319097
SL004301	8.65607	7.65464	13.0526	8.74305	0.59098
SL003332	11.2539	10.8023	14.8583	11.306	0.335232
SL004649	10.2684	9.75839	13.8984	10.3169	0.31617
SL003177	10.7027	10.4427	15.4637	10.7867	0.479948
SL001897	11.2904	10.2712	12.8379	11.2942	0.39975
SL004652	11.8738	11.2428	12.9383	11.896	0.191385
SL008008	10.0763	9.54187	11.9087	10.105	0.221031
SL006911	9.81041	9.48704	11.2297	9.87102	0.25903
SL004725	9.43858	8.77709	11.1549	9.47582	0.206339
SL003793	8.53761	7.78986	12.8186	8.59035	0.358398
SL004724	11.7607	11.046	15.6169	11.7892	0.378406
SL000554	9.32148	8.92125	13.0872	9.36154	0.323065
SL006922	12.0753	10.8196	13.6322	12.1179	0.349157
SL006923	10.3694	10.0055	13.9116	10.4505	0.39314
SL004305	10.7507	9.93458	14.4476	10.8471	0.430173
SL006372	10.5694	10.0161	14.2888	10.604	0.304925
SL002783	10.3934	9.86589	11.7906	10.4185	0.213137
SL003303	13.0181	11.2793	15.2327	13.1166	0.847274
SL004330	11.1948	10.8243	12.4731	11.2206	0.163088
SL000480	10.0088	9.60696	13.1101	10.0476	0.288872
SL002621	12.8713	11.6267	15.4494	13.0366	0.732735
SL000131	9.17018	8.35535	11.6233	9.20272	0.28643
SL002541	11.3319	10.7254	12.687	11.3348	0.252453
SL004670	11.0304	10.6211	13.1387	11.0722	0.267356
SL005156	11.5943	10.7872	13.1657	11.6717	0.43818
SL000007	11.3514	10.8746	12.0179	11.3695	0.181595
SL004067	10.6202	10.228	12.2618	10.6585	0.266581
SL003542	11.1212	10.454	13.0834	11.1638	0.30998
SL002561	10.1464	9.83573	12.8628	10.241	0.355558
SL004686	11.7185	11.2011	13.9192	11.7683	0.308648
SL004851	12.109	11.6806	15.7057	12.1852	0.437686
SL000136	10.385	9.61637	14.8676	10.58	0.706714
SL004078	11.2918	10.3045	12.9063	11.3487	0.499695
SL000668	13.027	11.3619	16.3744	12.9908	0.678695
SL002655	11.421	10.4466	14.4279	11.4225	0.481165
SL004872	10.6033	9.51076	12.7848	10.7196	0.664866
SL003169	10.9591	10.4935	11.6444	10.9653	0.167519
SL005165	11.2834	10.9202	12.1244	11.3119	0.142437
SL005256	11.769	8.95768	14.7567	11.8317	1.12577
SL005170	11.0094	10.6343	13.4242	11.0486	0.230715
SL001802	9.67207	9.19722	13.1499	9.79916	0.465961
SL001997	13.0093	11.7155	13.909	13.0079	0.371243
SL004861	10.4101	10.08	11.5401	10.4297	0.139786
SL004875	10.8813	10.4878	12.4799	10.9088	0.193612
SL005194	11.2333	10.6998	14.7069	11.3587	0.525749
SL005205	9.8392	9.46455	11.2074	9.88068	0.218497
SL004862	12.4526	11.538	13.4487	12.4606	0.350879
SL004687	9.57818	8.926	11.6447	9.62303	0.293076
SL000384	8.73708	7.93487	11.683	8.81398	0.352971
SL000004	11.231	10.3029	15.354	11.4767	0.873294
SL003301	16.2083	14.5879	17.7724	16.1907	0.479979
SL005164	10.7151	10.2633	13.523	10.7845	0.317206
SL004271	10.578	10.1743	12.7608	10.6472	0.337521
SL003326	13.0895	10.7734	16.9838	13.1636	0.915861
SL000519	10.9636	10.1793	14.9391	11.0732	0.514073
SL000633	11.5713	10.8728	13.8101	11.6824	0.478043
SL004343	10.8179	10.3466	13.7949	10.8873	0.385909
SL003308	9.7988	9.36588	12.828	9.89083	0.425112
SL005204	11.4411	10.606	13.7022	11.4769	0.3448
SL004327	11.1762	10.3335	12.5191	11.1804	0.389379
SL004339	10.3175	9.98598	14.2307	10.4608	0.536592
SL005234	11.6883	11.1346	14.4693	11.7184	0.269908
SL000478	11.5584	10.7666	14.1138	11.5884	0.394563
SL001718	11.074	10.474	15.4967	11.1414	0.372328
SL002508	13.1453	12.0899	15.3013	13.1621	0.451389
SL002640	10.4568	10.0125	12.9711	10.5313	0.338283
SL005227	10.9088	10.4504	14.2455	11.018	0.435998
SL005228	9.76934	9.27868	12.532	9.83456	0.312059
SL005233	10.879	10.5322	12.1792	10.9228	0.212623
SL004771	11.3774	10.8944	16.7711	11.5126	0.615129
SL004750	10.675	10.2569	14.9415	10.7659	0.429549
SL006918	11.8749	10.4365	14.9527	12.023	0.726331
SL004486	11.3402	10.7586	12.8228	11.3746	0.256636
SL002524	9.9901	9.62443	12.6246	10.0067	0.191675
SL003305	11.2388	10.8751	16.9199	11.3316	0.458054
SL005215	11.2534	9.15482	12.6232	11.1608	0.628775
SL004626	10.476	10.0573	14.228	10.5138	0.308107
SL007261	13.6405	11.8798	16.6513	13.7174	0.62753
SL008611	13.2741	11.6708	15.8667	13.3215	0.7226
SL008421	9.83747	9.24008	12.6526	9.95154	0.440358
SL010369	10.8591	10.3187	11.521	10.8606	0.201752
SL007280	10.5228	9.94705	13.8245	10.5726	0.357431
SL007284	10.2215	9.74062	11.2753	10.22	0.162196
SL010372	9.52239	9.06958	12.1374	9.54306	0.25485
SL000658	10.5223	10.3127	11.391	10.5496	0.146102
SL010392	10.1485	9.1955	12.1798	10.2018	0.386631
SL002695	11.6648	10.9018	14.1017	11.6881	0.27125
SL008023	10.9172	10.5	14.832	11.0561	0.55008
SL007122	11.9838	11.305	14.8489	12.0593	0.409364
SL003918	11.2131	10.7828	11.88	11.2313	0.158372
SL010393	11.9101	11.2663	17.5127	11.9428	0.380787
SL007100	13.4683	11.042	17.1355	13.5178	1.14662
SL006992	9.89845	9.24198	11.8206	9.91219	0.232962
SL005437	9.53197	9.25974	12.5832	9.58767	0.30533
SL010374	10.9939	10.1079	13.1675	11.0816	0.552729
SL010375	11.8205	10.6034	14.8977	11.8727	0.56426
SL003770	11.345	9.98826	13.4268	11.3816	0.659665
SL010379	11.2022	10.8054	13.2456	11.2353	0.25821
SL010391	12.48	11.2245	14.4329	12.494	0.426596
SL004661	9.93103	9.40003	11.0336	9.97113	0.282118
SL006803	10.8565	10.5557	12.379	10.895	0.189866
SL007804	13.0772	11.9845	14.528	13.0909	0.352783
SL010449	10.3989	9.71665	11.6272	10.4112	0.219998
SL008773	12.9072	11.7397	15.3039	12.8851	0.482907
SL010451	11.958	11.3723	13.6023	12.0452	0.366684
SL008623	10.0508	9.26491	11.831	10.1111	0.36571
SL010455	9.80623	9.47228	11.1392	9.82773	0.184323
SL010461	9.68264	9.09935	13.4925	9.77863	0.427584
SL004858	11.3246	10.2268	12.6993	11.3174	0.345308
SL010463	9.61563	8.8857	11.6932	9.66959	0.305271
SL004860	12.4864	11.8102	14.0621	12.5145	0.283246
SL007385	9.37112	9.03067	11.7279	9.43121	0.288164
SL010464	13.234	12.2487	14.913	13.2413	0.334782
SL004610	11.7941	11.2942	14.2149	11.8251	0.297773
SL007674	12.1869	11.0859	13.8259	12.1833	0.471713
SL004805	11.7323	10.7145	12.7886	11.738	0.338721
SL006892	9.24745	8.75489	11.862	9.28318	0.266076
SL010520	11.0153	10.4986	12.8948	11.0469	0.223695
SL002792	12.0998	10.7163	13.8632	12.1531	0.56537
SL010491	9.91603	9.40024	11.569	10.0206	0.398567
SL010492	10.7735	10.117	13.1044	10.9332	0.592587
SL004868	8.93399	8.55919	13.1145	9.01958	0.431399
SL010495	10.1379	9.66445	12.716	10.2109	0.360449
SL010496	10.8522	10.029	13.552	10.9121	0.358314
SL010522	10.2169	9.60585	12.7435	10.2659	0.292535
SL003726	9.78578	9.18809	18.2904	9.93878	0.824792
SL010610	9.47917	8.88966	10.5809	9.47404	0.173712
SL006910	11.6407	9.86279	14.1236	11.6118	0.632791
SL004654	9.80445	9.39081	13.8315	9.87586	0.419915
SL010499	9.0045	8.26303	10.2286	9.00441	0.184852
SL010613	10.0091	9.5588	11.5138	10.035	0.21569
SL007228	11.3598	10.8514	13.6833	11.4472	0.357529
SL010508	10.9578	9.7848	11.7445	10.9488	0.214193
SL010510	10.8948	10.4517	12.2029	10.9359	0.237794
SL010512	10.5394	10.2716	12.3663	10.571	0.21013
SL005258	9.57459	9.13417	12.2119	9.61283	0.330893
SL010616	12.0912	10.7842	14.9412	12.207	0.738443
SL007747	10.4964	9.96159	14.4873	10.5143	0.279778
SL005261	10.0646	9.56396	13.2645	10.1411	0.326663
SL010619	9.36282	8.76255	12.667	9.50043	0.511631
SL010529	13.798	12.7047	15.152	13.8355	0.356841
SL000104	11.5394	10.9801	13.466	11.581	0.243681
SL006374	10.7828	10.4045	12.1844	10.8036	0.186658
SL004660	12.0681	10.3921	14.3996	12.132	0.61893
SL010493	12.0964	11.4762	13.775	12.1705	0.366978
SL004869	11.3323	9.99591	14.4815	11.533	0.917892
SL004635	11.8687	11.5107	12.6868	11.8979	0.210132
SL010494	10.0692	9.73539	10.9392	10.0933	0.154094
SL005250	11.255	10.7823	12.6563	11.292	0.221474
SL007324	10.1765	9.81666	12.4985	10.213	0.263506
SL010498	8.2724	7.8009	12.0389	8.33591	0.367528
SL004298	12.1475	10.7841	13.9624	12.1421	0.447876
SL017188	12.2746	11.4141	15.709	12.3042	0.455894
SL010523	10.3423	9.90599	18.2937	10.5688	0.775078
SL004151	11.4675	11.0287	12.3013	11.4836	0.144369
SL000039	11.5855	10.5738	17.2836	11.907	1.05083
SL004125	13.2781	12.0492	14.6496	13.3051	0.455941
SL006916	10.6966	10.2561	17.4284	10.7953	0.63499
SL006917	11.7508	9.49326	14.159	11.7333	0.746623
SL005084	11.3246	10.1018	13.0108	11.3494	0.378363
SL004155	12.9534	11.0972	16.4565	12.8806	0.663836
SL009089	10.5479	10.1495	12.7611	10.6405	0.371982
SL010513	12.673	11.3904	14.9184	12.731	0.686639
SL010515	10.9915	10.3856	13.0904	11.0881	0.442441
SL000582	10.7893	10.0515	13.9827	10.819	0.3293
SL005224	10.0449	9.55899	12.6111	10.0693	0.237772
SL005225	11.9077	11.4135	13.8977	11.9422	0.279348
SL006480	10.312	9.7761	12.4386	10.3635	0.290511
SL008122	10.7154	9.6954	12.9434	10.9023	0.71286
SL011073	12.4124	11.1158	16.6569	12.4987	0.678489
SL000299	9.23793	8.97728	10.5329	9.26747	0.173565
SL003167	11.9928	10.3985	15.33	12.1369	0.939099
SL004331	9.65982	9.43484	10.5499	9.68131	0.143332
SL000408	10.2717	9.83289	13.2398	10.3611	0.391834
SL004335	8.6014	7.96174	9.55421	8.61192	0.172537
SL003172	12.2951	10.8466	15.4902	12.297	0.565331
SL002075	9.04002	8.59246	10.3952	9.05853	0.189526
SL001713	9.40642	9.08693	10.7688	9.44238	0.199502
SL004350	9.48704	8.95826	10.5164	9.49842	0.141925
SL000507	8.51491	7.99209	9.34563	8.52154	0.233701
SL000508	11.782	10.6896	15.4846	11.8135	0.354161
SL000089	10.5867	10.3743	15.419	10.6382	0.399774
SL000589	10.8063	9.65499	12.4407	10.8494	0.491061
SL000615	9.42626	9.14236	13.5392	9.53747	0.408248
SL003862	9.60492	9.23458	12.337	9.71019	0.444931
SL009216	9.34341	9.08215	11.6189	9.40504	0.300413
SL003711	12.422	11.3815	15.727	12.5047	0.547301
SL007121	9.51708	8.97241	15.5945	9.67754	0.707315
SL008504	12.3361	11.0151	13.9205	12.3518	0.491669
SL007806	11.6887	11.1902	13.5246	11.7117	0.206169
SL007531	9.85144	9.27076	11.4468	9.90877	0.290437
SL004864	10.0547	9.52493	13.4998	10.1547	0.402045
SL004580	12.1252	11.6149	13.448	12.1421	0.229569
SL000458	10.4553	9.94837	13.771	10.5583	0.445486
SL000076	10.7102	10.1355	17.3125	10.886	0.692111
SL002517	10.0172	9.54535	17.709	10.1432	0.730992
SL000306	9.85066	9.28794	13.0758	9.88646	0.290527
SL003970	9.48965	9.06797	17.8738	9.55988	0.564749
SL011509	10.2634	9.09856	13.6897	10.3633	0.619999
SL000570	9.1153	8.65964	11.3445	9.19555	0.335441
SL011510	10.8607	10.4534	14.8113	10.9093	0.377061
SL011448	10.3782	9.89512	12.5743	10.4233	0.251556
SL002684	11.5191	10.9253	12.7401	11.5693	0.300637
SL000645	10.4302	9.91259	12.0648	10.4746	0.29551
SL000027	10.6033	9.79799	14.0103	10.6886	0.442856
SL004304	11.0454	10.3395	14.8724	11.0943	0.378249
SL003200	11.4973	10.9193	13.7605	11.5294	0.309654
SL004642	11.6007	10.2848	14.0573	11.6203	0.543524
SL007642	11.7747	11.1538	14.5756	11.8441	0.350175
SL000638	11.8823	11.4072	13.5471	11.9751	0.361075
SL005508	11.0495	10.3033	13.5911	11.1968	0.473955
SL000377	10.2784	9.70995	16.4946	10.4865	0.792392
SL007888	9.43775	8.92273	13.5381	9.5462	0.551768
SL008382	12.3304	10.7625	16.1588	12.3917	0.779411
SL007403	10.0027	9.52943	12.912	10.078	0.392756
SL004844	10.6006	10.2206	16.5196	10.6813	0.464731
SL007651	10.6262	10.1558	16.9752	10.8544	0.818472
SL003990	9.47289	8.97527	15.9245	9.66238	0.705451
SL004063	10.3863	10	14.7246	10.4772	0.396373
SL006912	9.20114	8.46801	13.7871	9.35354	0.624247
SL006913	12.8782	10.8212	16.8834	12.8337	0.939696
SL007423	12.869	11.6825	15.9165	12.947	0.62375
SL007620	11.7016	10.9552	14.8628	11.7543	0.342998
SL007358	11.9768	11.4221	16.1719	12.0574	0.434636
SL010503	11.4179	10.6955	13.6821	11.4817	0.383817
SL010504	11.7973	10.4982	13.9212	11.8347	0.281323
SL010505	10.2355	9.47857	13.1696	10.263	0.258825
SL010502	9.92852	9.39124	15.6947	10.0704	0.575732
SL010509	9.75238	9.17817	15.3601	9.81463	0.443791
SL011071	10.1499	9.69627	16.7426	10.3214	0.727593
SL003761	10.8294	10.2213	13.8671	10.8781	0.357335
SL010514	9.80607	9.30241	14.4165	9.87141	0.398912
SL004492	10.9451	10.3873	13.6184	10.9943	0.349403
SL010528	12.1054	10.8467	14.6012	12.2443	0.739459
SL011629	11.5007	10.8951	13.1141	11.5332	0.28234
SL011530	11.54	10.8566	13.538	11.6485	0.532658
SL000449	9.68299	9.26889	11.417	9.72626	0.229943
SL011631	12.1613	11.5259	16.7589	12.4308	0.804847
SL008063	11.8641	11.1978	14.2041	11.9938	0.567972
SL010973	10.9447	10.4993	11.9389	10.9745	0.156928
SL005630	9.95376	9.19057	12.4098	9.99196	0.312319
SL011528	11.3246	10.252	15.6181	11.435	0.778325
SL006919	8.53177	8.17792	11.5548	8.66231	0.441798
SL011529	11.1791	10.3742	14.5548	11.3265	0.622479
SL011630	10.763	10.4386	13.6189	10.9091	0.465871
SL011533	10.1758	9.31152	13.9153	10.3654	0.722114
SL000588	11.9307	11.475	16.7466	12.003	0.503092
SL008157	10.9087	10.5269	14.373	11.0486	0.465245
SL011549	10.6883	10.2441	13.237	10.9145	0.637083
SL008835	9.37786	8.94661	10.8288	9.39592	0.183991
SL011232	10.046	9.35513	11.0962	10.0678	0.197634
SL003753	10.327	9.87728	16.1233	10.5011	0.711596
SL005685	10.9184	10.3628	15.3641	11.0702	0.564601
SL005687	11.9785	10.7028	16.0756	12.1296	0.832909
SL009431	10.3595	9.43588	12.7279	10.426	0.332597
SL010927	12.8182	11.3305	16.4124	12.9593	0.843601
SL006132	10.53	10.1218	12.0568	10.5837	0.224634
SL009629	11.6074	10.7263	13.257	11.6541	0.24528
SL010328	10.1913	9.89936	16.3462	10.3467	0.668231
SL001905	10.1719	9.55478	14.265	10.2849	0.497294
SL004820	12.1007	9.92288	16.2135	12.4538	1.61983
SL011709	11.0167	10.4335	15.2314	11.2285	0.664833
SL007266	9.18339	8.73775	12.8933	9.23699	0.320731
SL005372	11.4946	10.8799	15.1318	11.5945	0.460496
SL004119	9.1955	8.68194	10.1723	9.22966	0.203655
SL003171	9.29094	9.0045	10.9247	9.33676	0.235925
SL000451	13.9616	12.6748	16.025	14.0278	0.557507
SL003104	10.304	9.9202	12.3056	10.3492	0.226286
SL004340	10.1986	9.77198	11.8105	10.2805	0.309713
SL000674	10.4986	10.1412	11.6879	10.5365	0.202824
SL004068	8.77709	8.3733	11.6495	8.91191	0.438175
SL000138	8.49705	8.21917	11.63	8.55468	0.281619
SL004353	9.95114	9.39853	14.6617	10.0845	0.543465
SL004351	9.96463	9.38241	13.0559	10.0239	0.405178
SL004346	9.88692	9.42941	15.0012	9.96735	0.52574
SL000483	9.36654	8.84987	11.3114	9.38058	0.240819
SL003183	11.7979	10.991	15.3277	11.8778	0.504557
SL003186	10.132	9.77923	11.8833	10.1563	0.189376
SL000517	10.1825	9.68755	11.8149	10.2115	0.233167
SL004359	9.2854	8.80025	16.2484	9.35945	0.507686
SL004360	8.886	8.65785	11.9644	8.96321	0.36428
SL000540	10.9091	10.2654	12.3	10.9179	0.199959
SL000088	9.82416	9.45718	11.7495	9.87699	0.301122
SL000613	11.7031	10.7635	14.7305	11.7311	0.488421
SL002093	10.4573	9.67013	12.8578	10.5663	0.541989
SL000587	8.90117	8.49985	11.0861	8.96877	0.304366
SL008378	10.7487	9.6954	12.6281	10.7505	0.257626
SL009207	9.81234	9.41638	11.3553	9.84669	0.202783
SL012188	10.1833	9.57913	13.3482	10.2641	0.338421
SL004795	10.464	10.0709	12.3648	10.5289	0.309368
SL005588	8.54226	7.14568	11.2979	8.64854	0.82543
SL007022	11.3046	10.453	12.0888	11.2972	0.266096
SL004899	6.98527	6.34163	8.51846	7.01904	0.26508
SL011211	10.5981	9.18735	12.9236	10.6594	0.724034
SL003304	12.963	11.9763	13.9378	12.9668	0.321642
SL011770	11.6454	11.0784	13.9683	11.6533	0.209823
SL012168	9.25172	8.95216	10.7589	9.30705	0.240157
SL001999	9.21941	8.83731	10.8032	9.2529	0.233864
SL004921	13.2162	11.701	16.3416	13.3107	0.790035
SL006268	10.2885	9.37699	13.748	10.5176	0.827452
SL011768	9.62443	9.11166	13.5195	9.74633	0.505492
SL005493	9.25337	8.74551	10.9863	9.28834	0.226759
SL011772	10.2236	9.70511	11.5975	10.2919	0.258317
SL006705	9.80332	9.02042	12.5949	9.91568	0.414749
SL004901	9.30697	8.76785	10.079	9.31618	0.150131
SL008865	10.2264	9.69192	12.0098	10.3032	0.315222
SL011535	10.0429	9.42312	11.1536	10.0893	0.32128
SL006088	10.2108	9.28378	14.3986	10.2818	0.627475
SL000057	10.4499	10.04	14.0588	10.5042	0.376598
SL006698	9.19303	8.49945	10.8226	9.19645	0.177966
SL004940	12.1178	11.0005	14.4555	12.1968	0.625435
SL013489	9.54959	9.02403	11.9473	9.61855	0.359666
SL008516	13.495	11.3284	15.3871	13.5096	0.742163
SL013490	11.3144	9.92674	12.5267	11.3135	0.411685
SL000062	9.01792	8.60918	11.3052	9.11019	0.30506
SL000305	9.3289	8.783	10.887	9.37942	0.268876
SL004837	9.26256	8.84486	11.5045	9.36202	0.351183
SL007003	10.6725	10.3513	13.8663	10.7689	0.391703
SL005161	9.11764	8.29186	10.478	9.14394	0.243803
SL004334	11.3261	10.6745	14.1493	11.4359	0.409539
SL014308	8.88996	8.42206	11.9117	8.99091	0.397314
SL004348	8.49785	8.22593	10.8195	8.63791	0.407796
SL004349	9.18735	8.69697	14.5362	9.2789	0.52573
SL009988	11.0821	10.6073	13.6009	11.1979	0.451345
SL003674	10.5721	10.0703	11.4395	10.5827	0.147787
SL013988	9.3837	9.06555	12.1663	9.44996	0.299074
SL014130	9.44853	9.02542	11.0503	9.48405	0.212116
SL009045	12.1081	9.72639	14.9458	12.1383	0.979988
SL014093	11.1255	10.7628	13.074	11.18	0.264067
SL014088	10.6221	10.2649	12.4474	10.6742	0.267856
SL007024	9.69262	9.3262	12.1464	9.72504	0.258855
SL014096	8.08215	7.48462	11.8503	8.20109	0.534347
SL014108	9.01402	8.58609	12.2929	9.1112	0.428301
SL006523	11.3911	9.68598	13.2417	11.4013	0.586584
SL014069	12.234	11.041	14.0034	12.1836	0.479878
SL006998	10.0462	8.60881	12.7967	10.2068	0.819162
SL013754	11.2382	10.807	12.839	11.2688	0.251808
SL001753	8.11946	7.71631	9.91409	8.17527	0.302505
SL014029	9.9642	9.50144	13.773	10.0414	0.379475
SL008945	8.51885	8.08162	16.7247	8.96049	1.20719
SL004908	10.7418	10.3106	11.7861	10.7628	0.202562
SL000314	14.0812	11.1381	17.3331	14.1958	1.44215
SL001691	10.5418	9.88325	12.8161	10.6001	0.381486
SL005187	9.72945	9.27473	12.5845	9.84001	0.461889
SL005188	11.5416	10.3569	13.6986	11.5829	0.506391
SL000470	9.76122	9.46923	12.7187	9.85424	0.370517
SL005184	9.19599	8.80768	11.7513	9.2319	0.272791
SL000522	11.0577	9.12335	13.5047	11.1154	0.822139
SL012740	9.74467	9.52219	14.3551	9.80697	0.387694
SL012822	10.5226	9.36829	12.3144	10.5518	0.402242
SL008644	13.1761	10.2281	14.2571	13.0368	0.697502
SL009768	10.0268	9.55593	13.4173	10.0727	0.314543
SL014048	9.50661	9.11452	10.6256	9.53547	0.20237
SL006197	10.6621	10.4693	13.249	10.6965	0.236429
SL014071	10.4132	10.1007	12.4461	10.482	0.281375
SL005575	9.98413	9.34696	13.9538	10.0497	0.422885
SL014008	13.4794	11.8733	15.5243	13.4814	0.606553
SL014094	10.961	10.163	13.3252	10.9785	0.247771
SL014129	9.43567	9.08746	11.3163	9.45543	0.186403
SL014009	10.6165	10.3282	11.7607	10.6454	0.189365
SL013548	10.5862	10.142	11.3875	10.593	0.130226
SL014111	9.37764	8.94953	11.8957	9.43206	0.297314
SL013969	10.3806	9.67913	11.7792	10.4344	0.338566
SL004299	8.46923	8.10538	9.8392	8.50999	0.224433
SL012108	9.99633	9.64151	16.5268	10.1034	0.589539
SL013989	9.82177	9.42689	10.8935	9.83547	0.163775
SL014468	10.5244	9.6879	12.3478	10.5926	0.42322
SL014070	11.7255	10.6165	12.7955	11.7529	0.413314
SL014091	9.84251	9.1809	18.0156	10.1666	1.14602
SL011499	11.9087	11.0142	14.4401	12.0421	0.666659
SL011498	11.0365	10.5571	12.2934	11.0453	0.147813
SL000087	10.1119	9.40748	12.0341	10.1753	0.276431
SL008085	10.2943	9.80655	17.9224	10.4162	0.753341
SL001868	10.6525	10.1	13.2853	10.6966	0.390903
SL001774	11.5975	10.9293	13.434	11.6713	0.389192
SL001726	10.0199	9.50124	15.0225	10.1559	0.628346
SL000597	10.4212	10.0215	15.3484	10.4685	0.377791
SL000479	12.1082	11.5709	13.465	12.1282	0.212352
SL008590	8.63372	7.66249	15.0595	8.80362	0.768484
SL016129	11.991	11.2496	13.5338	11.9947	0.305187
SL000347	10.8856	10.3877	12.4137	10.9047	0.218324
SL016148	10.9645	10.393	12.117	10.9994	0.266651
SL007153	10.4786	9.58214	14.9464	10.554	0.544839
SL008072	10.4227	9.73369	16.6603	10.8763	1.18776
SL004156	12.5055	11.8847	14.7735	12.5383	0.318027
SL002654	11.8716	10.8861	13.1558	11.9129	0.359242
SL001729	11.398	10.5105	14.3046	11.4782	0.457793
SL000070	10.3115	9.43838	12.0791	10.365	0.41414
SL000125	11.194	10.7541	14.6517	11.2512	0.363417
SL004080	10.0039	9.27589	13.5126	10.0336	0.328457
SL004133	10.2447	9.76537	12.1206	10.2893	0.25924
SL003310	12.1479	10.9286	14.4252	12.224	0.549918
SL003362	10.5763	10.1757	12.9775	10.6687	0.372541
SL007756	11.213	10.2154	14.0886	11.3624	0.589467
SL000021	9.09038	8.5947	11.2033	9.16759	0.351975
SL000516	11.3582	10.0787	12.8914	11.3492	0.473118
SL009951	9.89436	9.34939	12.3521	9.95834	0.341563
SL003461	10.2183	9.63027	16.0755	10.2814	0.472723
SL000433	10.8244	10.0095	13.068	10.9895	0.661318
SL003710	9.67402	8.73708	14.2371	9.74975	0.478176
SL004482	11.865	10.8262	13.0249	11.8615	0.367596
SL005167	9.72264	9.20848	11.8183	9.75343	0.290861
SL004064	10.5488	9.67807	13.0465	10.5713	0.413203
SL001766	10.7544	9.62315	16.2555	11.2388	1.25564
SL004714	9.73166	8.93221	13.6675	9.82313	0.515915
SL003189	10.7673	9.8133	13.9308	10.8635	0.617181
SL000523	10.5746	10.0782	13.426	10.6562	0.384957
SL000024	11.1563	10.4251	12.9461	11.2715	0.430703
SL000139	11.9894	10.7232	15.6101	12.0119	0.491185
SL004925	11.4833	10.817	13.8167	11.4937	0.25526
SL004209	11.7557	10.667	14.8603	11.8338	0.547522
SL012538	11.6176	10.8814	12.6307	11.6309	0.317338
SL011708	10.2059	9.69052	12.3611	10.2645	0.322267
SL007729	16.4139	13.3039	17.7595	16.3062	0.691787
SL005675	14.8559	13.7489	15.7889	14.8587	0.352261
SL008099	10.6826	9.8275	12.5493	10.7513	0.410165
SL000339	9.64764	8.63154	13.1284	9.72037	0.395581
SL003728	9.70304	9.18165	12.5183	9.76186	0.325674
SL013240	13.0991	12.309	15.3964	13.1981	0.512341
SL008709	9.57592	9.114	13.4053	9.6587	0.413963
SL012248	8.92214	8.57327	13.9844	9.02498	0.436667
SL010373	8.97728	8.47411	12.569	9.0648	0.420649
SL012469	10.3817	8.60511	11.9658	10.353	0.4855
SL000670	8.58984	7.79896	12.8974	8.74148	0.671107
SL002756	9.13237	8.66178	11.9784	9.25213	0.445762
SL011616	9.73268	9.28748	11.7356	9.82426	0.343381
SL002646	10.9411	10.3993	14.1766	11.1146	0.59063
SL007453	10.3608	9.95768	14.3397	10.4425	0.419217
SL007281	9.82257	9.4096	11.75	9.89738	0.294602
SL006993	10.259	9.82941	13.5424	10.3252	0.33575
SL005846	11.0537	10.0953	13.861	11.1198	0.438973
SL003685	11.9605	10.5425	14.899	12.0359	0.718956
SL006091	11.1539	10.5934	14.6165	11.2163	0.396319
SL008933	10.4054	9.84298	15.0547	10.5124	0.515175
SL004932	10.3504	9.86913	13.4	10.4318	0.365102
SL009792	12.2673	11.1891	16.2093	12.4776	0.901583
SL002522	12.0444	11.4621	14.7194	12.1002	0.379923
SL008059	9.25739	8.75589	11.4111	9.31708	0.305903
SL006629	13.3817	11.9672	17.2168	13.4972	0.727673
SL008190	8.95478	8.43505	13.1739	9.03355	0.385246
SL009868	10.028	9.63227	14.6498	10.2009	0.586564
SL004737	11.5671	11.1295	14.969	11.6866	0.4605
SL000142	9.67507	9.2211	16.1436	9.86147	0.651848
SL004782	10.9203	9.79133	12.6011	10.9225	0.45
SL004852	11.2236	10.57	15.9555	11.3597	0.582399
SL011100	11.4189	11.1032	13.7065	11.4969	0.348388
SL014208	10.681	10.3138	15.3623	10.8362	0.553682
SL003739	10.4351	9.87283	14.4044	10.4957	0.369731
SL014294	9.86867	9.43525	12.3393	9.90776	0.292743
SL004859	10.8734	10.6224	17.8294	10.9711	0.628622
SL005181	9.55344	9.07655	14.9741	9.5983	0.45317
SL005183	12.2338	10.2093	13.8907	12.198	0.677137
SL005185	11.6334	10.8502	16.7932	11.7328	0.617596
SL005189	9.83257	9.52728	12.7436	9.93404	0.410863
SL007774	10.9838	10.6788	13.0388	11.077	0.303705
SL009202	11.5156	11.0936	14.8228	11.6325	0.417486
SL012698	10.9065	10.3407	13.8306	11.0061	0.45144
SL014269	10.718	9.58946	14.3622	10.8408	0.535306
SL014289	10.8699	10.2131	15.0653	10.969	0.516648
SL014209	10.4965	10.2057	12.5188	10.562	0.274345
SL005195	13.0058	8.95245	14.5063	12.8485	0.845174
SL005197	10.2626	9.7761	14.4036	10.3214	0.400519
SL005200	10.747	10.0136	15.4902	10.8654	0.669479
SL014288	11.2589	10.7179	13.5089	11.3015	0.270604
SL005207	12.4194	11.8476	15.5332	12.4812	0.366624
SL007356	10.5821	10.2295	13.8137	10.7398	0.557951
SL005210	13.8901	12.7836	15.8255	13.9242	0.497807
SL009054	10.4082	9.83321	13.5204	10.4345	0.301007
SL014268	12.3768	11.8819	14.6295	12.4061	0.330382
SL005213	10.6354	10.0385	11.8736	10.678	0.317843
SL014148	9.79067	9.44791	11.7972	9.8235	0.227444
SL005214	14.3662	13.543	15.658	14.3658	0.320224
SL014228	10.5614	9.93044	13.6663	10.6287	0.402767
SL005222	11.0598	10.3951	13.1405	11.0818	0.215149
SL004863	11.241	10.7344	15.1573	11.3572	0.526291
SL002078	11.5326	10.9058	17.1475	11.6281	0.515533
SL007547	13.1396	12.3642	15.3542	13.1973	0.450237
SL004366	10.6172	10.1163	16.5426	10.7426	0.706983
SL005231	12.8328	11.7115	14.0295	12.8484	0.369882
SL011406	10.1897	9.70113	11.5411	10.2146	0.155617
SL016548	10.3765	9.97413	13.5193	10.4408	0.336646
SL002542	10.6797	10.3501	13.2275	10.7414	0.333172
SL006476	11.8476	11.2849	14.005	11.8975	0.318207
SL016554	10.2726	9.74467	15.2454	10.3955	0.621551
SL007373	9.5214	8.8558	12.8341	9.66226	0.549699
SL005308	10.4345	9.67807	14.3442	10.4843	0.430791
SL015728	10.6111	10.2981	13.5002	10.6773	0.332377
SL016550	12.1174	10.6255	16.3437	12.29	0.894345
SL016551	9.74399	8.97126	13.0011	9.89002	0.576828
SL006189	11.2478	10.063	14.3972	11.3018	0.401519
SL014735	12.8973	10.6883	15.5648	12.8738	0.921119
SL016557	9.47978	8.90689	12.7964	9.54903	0.361758
SL007145	10.1083	9.76205	12.331	10.1386	0.217696
SL013928	9.80074	9.29783	13.326	9.95265	0.542447
SL004716	10.3066	9.26866	11.7426	10.3001	0.278156
SL016549	11.698	10.9592	13.7037	11.7597	0.436352
SL005793	12.2336	11.407	14.2586	12.2811	0.520749
SL005725	11.0791	10.7296	14.3135	11.1387	0.336282
SL003331	10.9648	10.4931	14.7952	11.0586	0.461848
SL016563	10.6398	10.1313	11.4059	10.6493	0.17149
SL003647	15.3379	14.2689	16.0632	15.3353	0.21798
SL004131	10.2211	9.68159	12.5258	10.3097	0.394766
SL004477	11.1584	9.99039	13.8059	11.2626	0.651769
SL008703	11.3067	10.6915	14.1062	11.3636	0.392037
SL006675	13.993	13.193	15.4762	14.0528	0.405342
SL000130	9.88402	9.46271	14.209	10.0045	0.555499
SL004145	10.109	9.58289	12.5709	10.1907	0.349709
SL000655	10.0215	9.68124	13.4771	10.1144	0.455725
SL004648	12.057	10.8223	14.7923	12.1464	0.585273
SL014113	10.4713	9.981	14.2319	10.5771	0.481475
SL002702	10.6284	10.1261	15.1335	10.7625	0.540552
SL010470	11.6806	10.5495	15.1182	11.7817	0.614867
SL016130	11.7009	10.9088	14.709	11.7792	0.470927
SL011068	10.941	10.3259	16.2571	11.0095	0.439224
SL000556	9.44956	9.09461	14.1492	9.5039	0.412262
SL016928	16.1166	11.9173	18.3688	16.0266	0.890157
SL010516	11.4129	9.23362	14.6603	11.4184	0.942962
